# Supplementary material
Source: bioRxiv or medRxiv preprint supplement (https://medrxiv.org/highwire/filestream/97715/field_highwire_adjunct_files/0/2020.09.21.20198838-1.pdf)

**N1**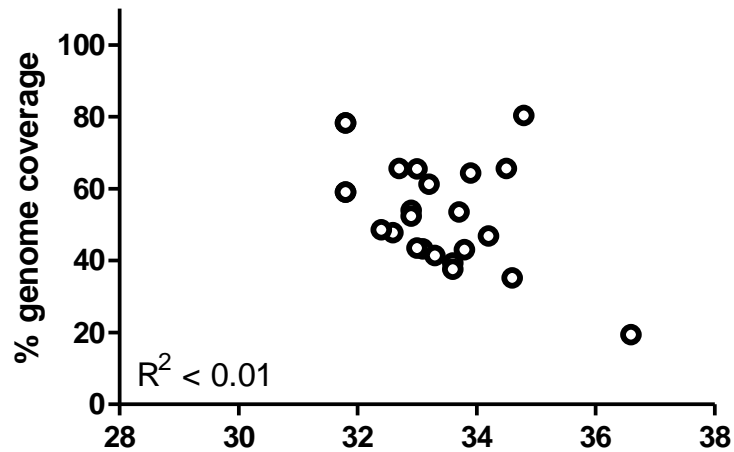**N2**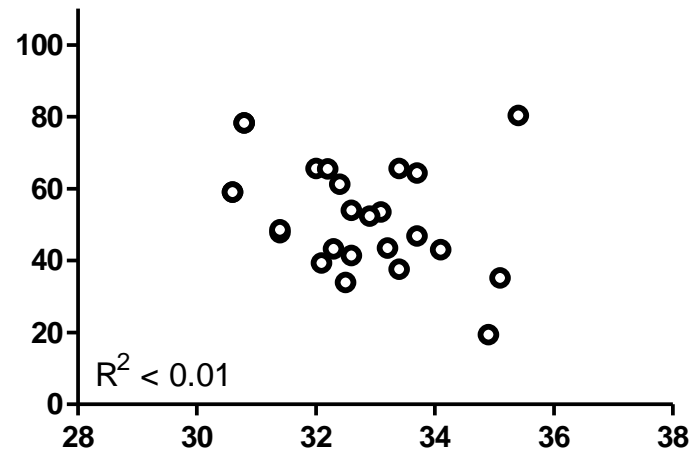**N3**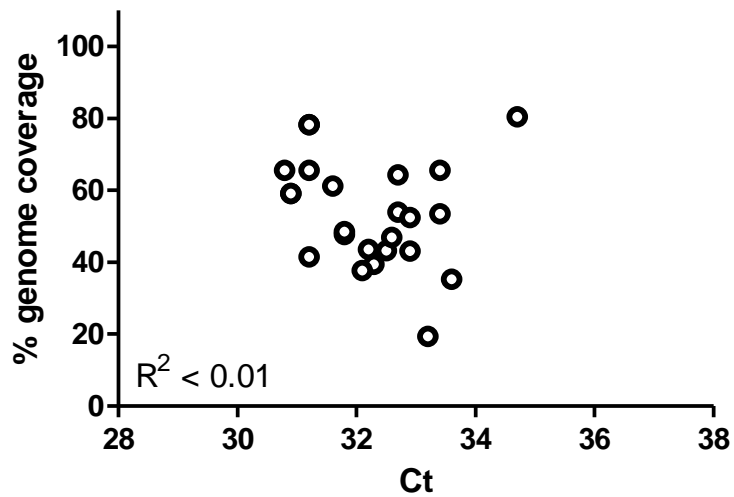**E\_Sarbecovirus**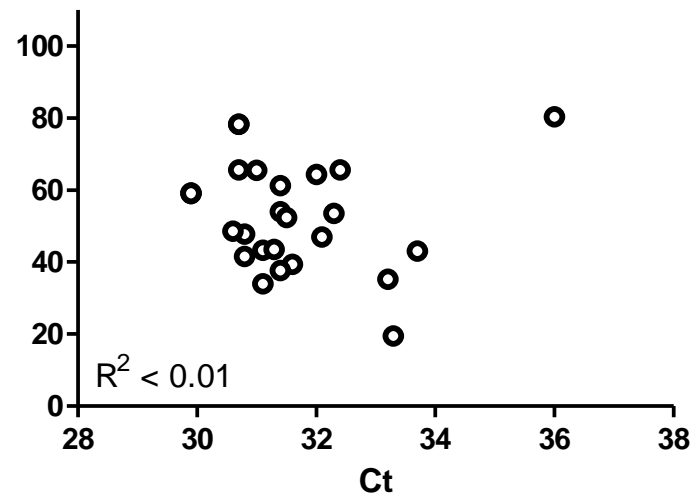

Supplement: Supplementary file [file 2020.09.21.20198838-1.pdf]
